# Supplementary material for: Application of poly- dl -methionine/gold nanoparticle-modified recycled battery graphite as an eco-friendly electrochemical sensor for the spasmolytic drug vincamine
Source: Royal Society of Chemistry journal article supplement (doi:10.1039/d5ra07233f), 2026-01-01
Supplement: d5ra07233f1.pdf [file d5ra07233f1.pdf]

## Application of poly DI-methionine/gold nanoparticles modified recycled battery graphite as an eco-friendly electrochemical sensor for the spasmolytic drug vincamine

Naglaa Abdel Sattar Kabil<sup>a</sup>, Nada Mousad Refay<sup>a</sup>, Yasmine Ahmed Sharaf<sup>a</sup>, Hisham Ezzat Abdellatef<sup>a</sup>, and Rasha M. El Nashar<sup>b,\*</sup>

<sup>a</sup>*Analytical Chemistry Department, Faculty of Pharmacy, Zagazig University, Zagazig 44519, Egypt.*

<sup>b</sup>*Chemistry Department, Faculty of Science, Cairo University, Giza, 112631, Egypt.*

| <b>Table S1.</b> The Analytical Eco Scale evaluation of the proposed method. |                                                |
|------------------------------------------------------------------------------|------------------------------------------------|
| <b><u>1. Chemicals</u></b>                                                   | <b>Amount x hazard type x hazard amount</b>    |
| Hydrochloric acid (0.1N)                                                     | 1 x1 x1=1                                      |
| H <sub>3</sub> PO <sub>4</sub>                                               | 1 x1 x2=2                                      |
| Acetic acid                                                                  | 1 x1 x2=2                                      |
| Boric acid                                                                   | 1 x1 x2=2                                      |
| Sodium Hydroxide                                                             | 1 x1 x2=2                                      |
| <b><u>2. Occupational hazard</u></b>                                         | hermetic sealing of the analytical process = 0 |
| <b><u>3. Energy</u></b> (kWh/sample)                                         | ≤ 0.1 = 0                                      |
| <b><u>4. Waste</u></b>                                                       |                                                |
| a)Amount                                                                     | 1-10 = 3                                       |
| b)Waste treatment                                                            | No treatment =3                                |
| <b>Total Penalty Points</b>                                                  | 15                                             |
